# Supplementary material for: miRNA Regulons Associated with Synaptic Function
Source: PLoS One. 2012 Oct 8;7(10):e46189. doi: 10.1371/journal.pone.0046189 (PMC3468272; doi:10.1371/journal.pone.0046189)
Supplement: Table S13 — Enriched KEGG pathways of mir-204 family targets. DIANA-miRPath v2.0 was used to predict all enriched KEGG pathways of mir-204 family targets. The target prediction threshold was set at 0.85. Benjamini-Hochberg [38] correction for multiple testing controlled the P-values. (XLSX) [file pone.0046189.s020.xlsx]

## Sheet: Sheet1
Enriched KEGG pathways of mir-204 targets
KEGG pathway	p-value	# genes	# miRNAs
Metabolism of xenobiotics by cytochrome P450	1.70414e-10	2	2
Calcium signaling pathway	0.000125348	17	4
Nicotinate and nicotinamide metabolism	0.000270135	2	1
Gap junction	0.00126172	7	4
Lysosome	0.00126172	12	4
Apoptosis	0.00126172	6	4
GnRH signaling pathway	0.00242414	11	4
ErbB signaling pathway	0.00257801	8	4
Axon guidance	0.00344275	14	4
Lysine degradation	0.00476382	4	4
MAPK signaling pathway	0.00503835	17	4
Long-term potentiation	0.00503835	8	4
Endocytosis	0.00758092	16	4
Vascular smooth muscle contraction	0.00970188	10	4
Glioma	0.0123579	6	3
Endocrine and other factor-regulated calcium reabsorption	0.0138281	6	3
Purine metabolism	0.0148493	10	4
Glycosphingolipid biosynthesis - ganglio series	0.0148493	2	2
Butanoate metabolism	0.0198807	4	2
Gastric acid secretion	0.0231357	6	3
Wnt signaling pathway	0.0385214	13	4
Hedgehog signaling pathway	0.0398144	7	4
Neurotrophin signaling pathway	0.045459	11	3
Type II diabetes mellitus	0.0593673	6	4
