# Supplementary material for: miRNA Regulons Associated with Synaptic Function
Source: PLoS One. 2012 Oct 8;7(10):e46189. doi: 10.1371/journal.pone.0046189 (PMC3468272; doi:10.1371/journal.pone.0046189)
Supplement: Table S21 — Enriched KEGG pathways of mir-1207 family targets. DIANA-miRPath v2.0 was used to predict all enriched KEGG pathways of mir-1207 family targets. The target prediction threshold was set at 0.85. Benjamini-Hochberg [38] correction for multiple testing controlled the P-values. (XLSX) [file pone.0046189.s028.xlsx]

## Sheet: Sheet1
Enriched KEGG pathways of mir-1207 targets
KEGG pathway	p-value	# genes	# miRNAs
Glycosaminoglycan biosynthesis - chondroitin sulfate	1.29037e-11	2	2
Metabolism of xenobiotics by cytochrome P450	4.63646e-09	2	1
Circadian rhythm - mammal	2.50109e-06	3	2
Adherens junction	1.24732e-05	7	2
Steroid biosynthesis	2.13751e-05	2	2
ECM-receptor interaction	0.00024489	7	1
Cell adhesion molecules (CAMs)	0.000639401	6	1
Tyrosine metabolism	0.00140221	2	2
Axon guidance	0.0138305	7	2
Focal adhesion	0.0154839	15	2
beta-Alanine metabolism	0.0202253	2	2
Dilated cardiomyopathy	0.0225133	8	2
Glycosphingolipid biosynthesis - ganglio series	0.0381923	1	1
Hypertrophic cardiomyopathy (HCM)	0.0394679	7	2
Fc gamma R-mediated phagocytosis	0.0397105	8	2
ErbB signaling pathway	0.0511321	4	2
