# Supplementary material for: miRNA Regulons Associated with Synaptic Function
Source: PLoS One. 2012 Oct 8;7(10):e46189. doi: 10.1371/journal.pone.0046189 (PMC3468272; doi:10.1371/journal.pone.0046189)
Supplement: Table S23 — Enriched KEGG pathways of mir-214 family targets. DIANA-miRPath v2.0 was used to predict all enriched KEGG pathways of mir-214 family targets. The target prediction threshold was set at 0.85. Benjamini-Hochberg [38] correction for multiple testing controlled the P-values. (XLSX) [file pone.0046189.s030.xlsx]

## Sheet: Sheet1
Enriched KEGG pathways of mir-214 targets
KEGG pathway	p-value	# genes	# miRNAs
TGF-beta signaling pathway	1.10468e-08	11	4
Glycosphingolipid biosynthesis - lacto and neolacto series	9.7046e-08	2	2
Other glycan degradation	0.000108379	1	1
Adherens junction	0.000413272	9	4
ECM-receptor interaction	0.00283951	4	2
Cytokine-cytokine receptor interaction	0.00306658	9	2
Huntington's disease	0.00600746	6	3
Pancreatic cancer	0.0115275	10	4
Pathways in cancer	0.0115275	27	4
Colorectal cancer	0.0135777	7	3
Endometrial cancer	0.0137924	5	3
Glycosaminoglycan biosynthesis - heparan sulfate	0.0292511	2	3
Regulation of actin cytoskeleton	0.0292511	20	4
Long-term depression	0.0338118	6	4
Adipocytokine signaling pathway	0.0394026	10	3
Other types of O-glycan biosynthesis	0.0573321	5	1
